# Supplementary material for: Rapid quantification of prion proteins using resistive pulse sensing
Source: Royal Society of Chemistry journal article supplement (doi:10.1039/d0an00063a), 2020-01-01
Supplement: d0an00063a1.pdf [file d0an00063a1.pdf]

## **Rapid Quantification of Prion Proteins using Resistive Pulse Sensing**

Matthew J. Healey,<sup>a</sup> , Muttuswamy Sivakumaran,<sup>b</sup> and Mark Platt <sup>a,\*</sup>

<sup>a</sup> Department of Chemistry, Loughborough University, Loughborough, Leicestershire, LE11 3TU, United Kingdom

<sup>b</sup> Peterborough City Hospital, Edith Cavell Campus, Bretton Gate, Peterborough, PE3 9GZ, United Kingdom

\* Corresponding author: M. Platt: [m.platt@lboro.ac.uk](mailto:m.platt@lboro.ac.uk), +44(0)1509222573

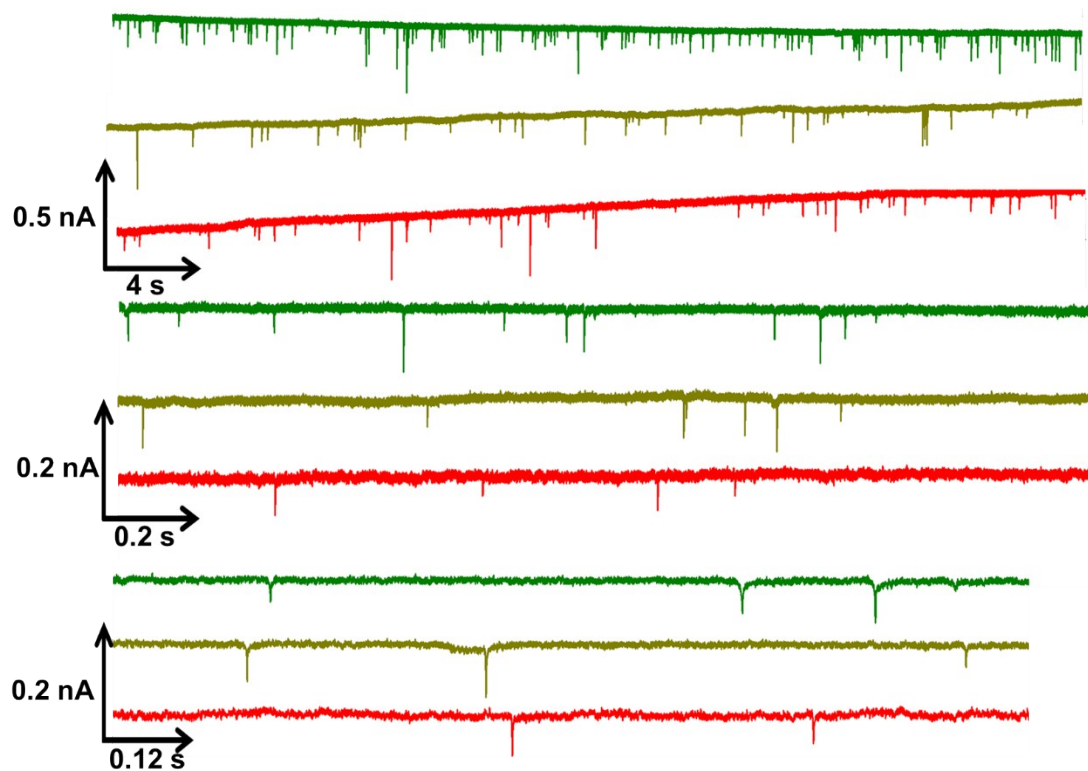

Figure s1. Example data sets for DNA blank s-beads (green), s-beads incubated with 50 nM PrP<sup>c</sup> (olive) and 100 nM PrP<sup>c</sup> (red).

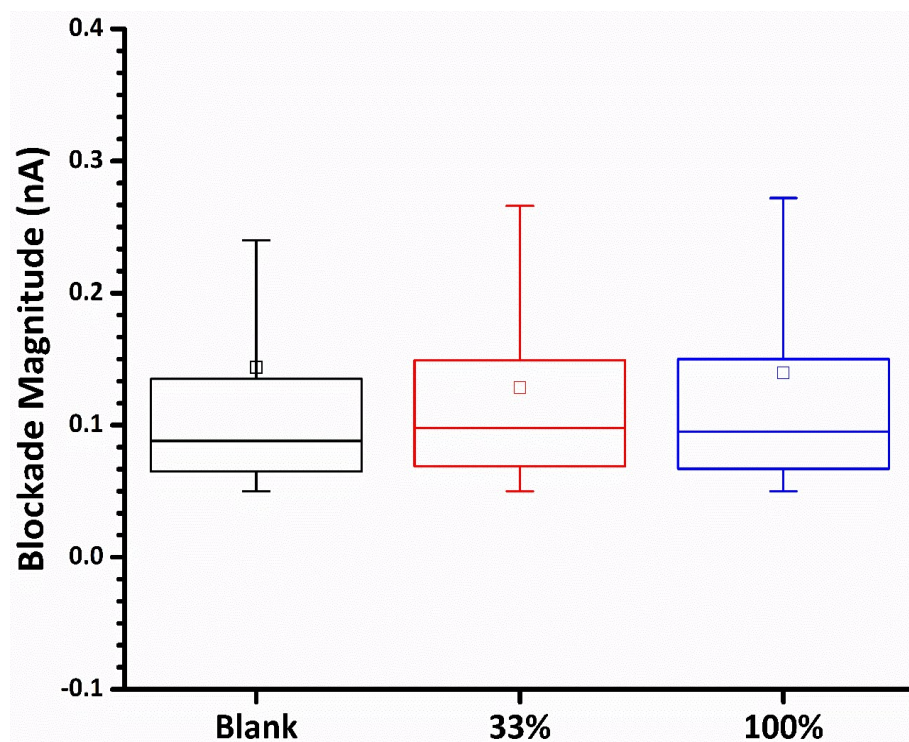

*Figure s2. Box plot of blockage magnitude of SPBs with concentration of DNA aptamer equivalent to the 33%, 100% and without DNA aptamer shown in figure 2. Experiments were conducted in 1x PBS at 0.4 V and 48.9 mm stretch.  $n = 3$  and events for each data set >500*

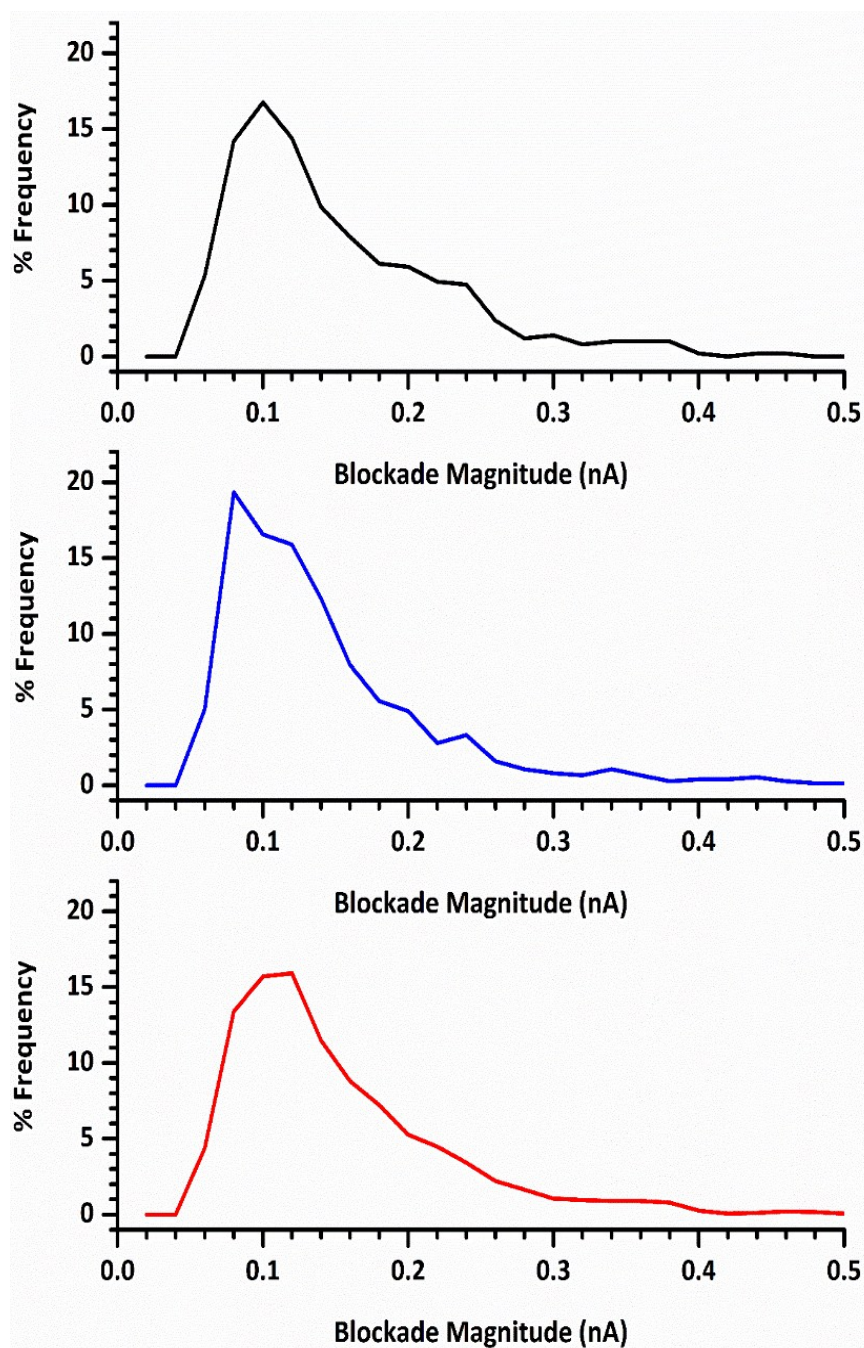

Figure s3. Blockade magnitude distributions particles shown in figure 2b Black: 0 nM; Blue: at 50 nM and; Red: 100 nM. Events for each data set >500



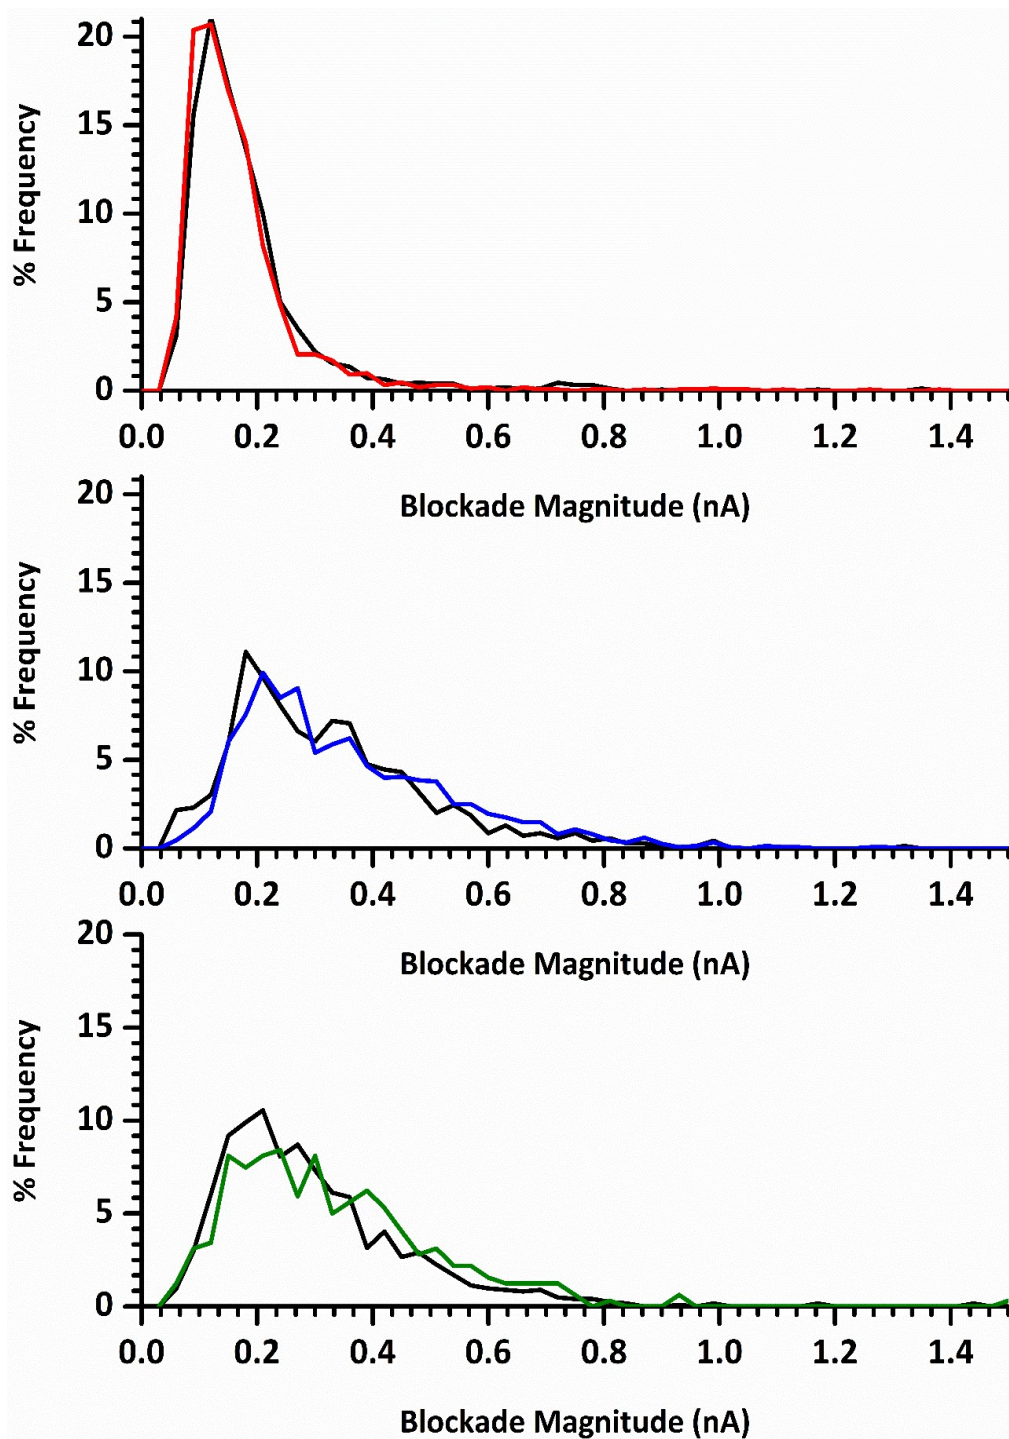

Figure s4 Blockade magnitude distributions for the incubation of S-beads with three abundant blood proteins at 200 nM with a constant concentration of SPPs at  $2 \times 10^9 \text{ mL}^{-1}$ - Red: albumin; Blue: fibrinogen; Green: IgG.  $n=3$ ; events for each dataset >500.
